# Supplementary material for: Salen complexes based on 1,4-diaminocyclohexane and their exploitation for the polymerisation of rac-lactide
Source: Royal Society of Chemistry journal article supplement (doi:10.1039/c3nj00111c), 2013-01-01

# Salen complexes based on 1,4-diaminocyclohexane and their exploitation for the polymerisation of *rac*-lactide

Stuart L. Hancock, Mary F. Mahon and Matthew D. Jones\*

Selected GPC/MALDI-ToF data for Al<sub>2</sub>(1)Me<sub>4</sub> (entry 9 Table 3)

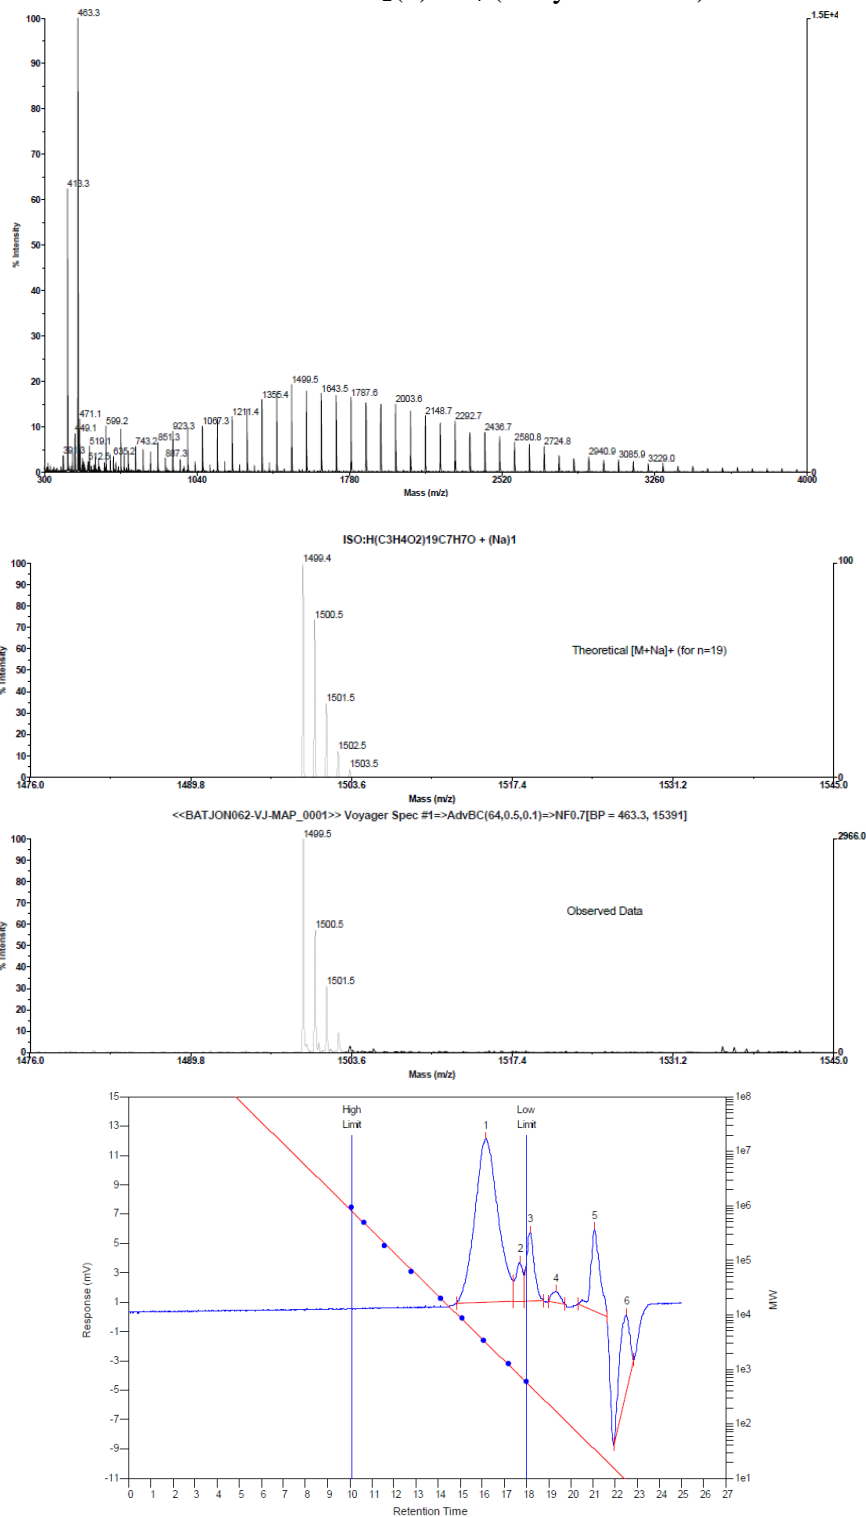

Supplement: c3nj00111c.pdf [file c3nj00111c.pdf]
